# Supplementary material for: Accurate and sensitive detection of microbial eukaryotes from whole metagenome shotgun sequencing
Source: bioRxiv or medRxiv preprint supplement (doi:10.1101/2020.07.22.216580), 2021-01-25

Figure S1. Schematic of the EukDetect pipeline.

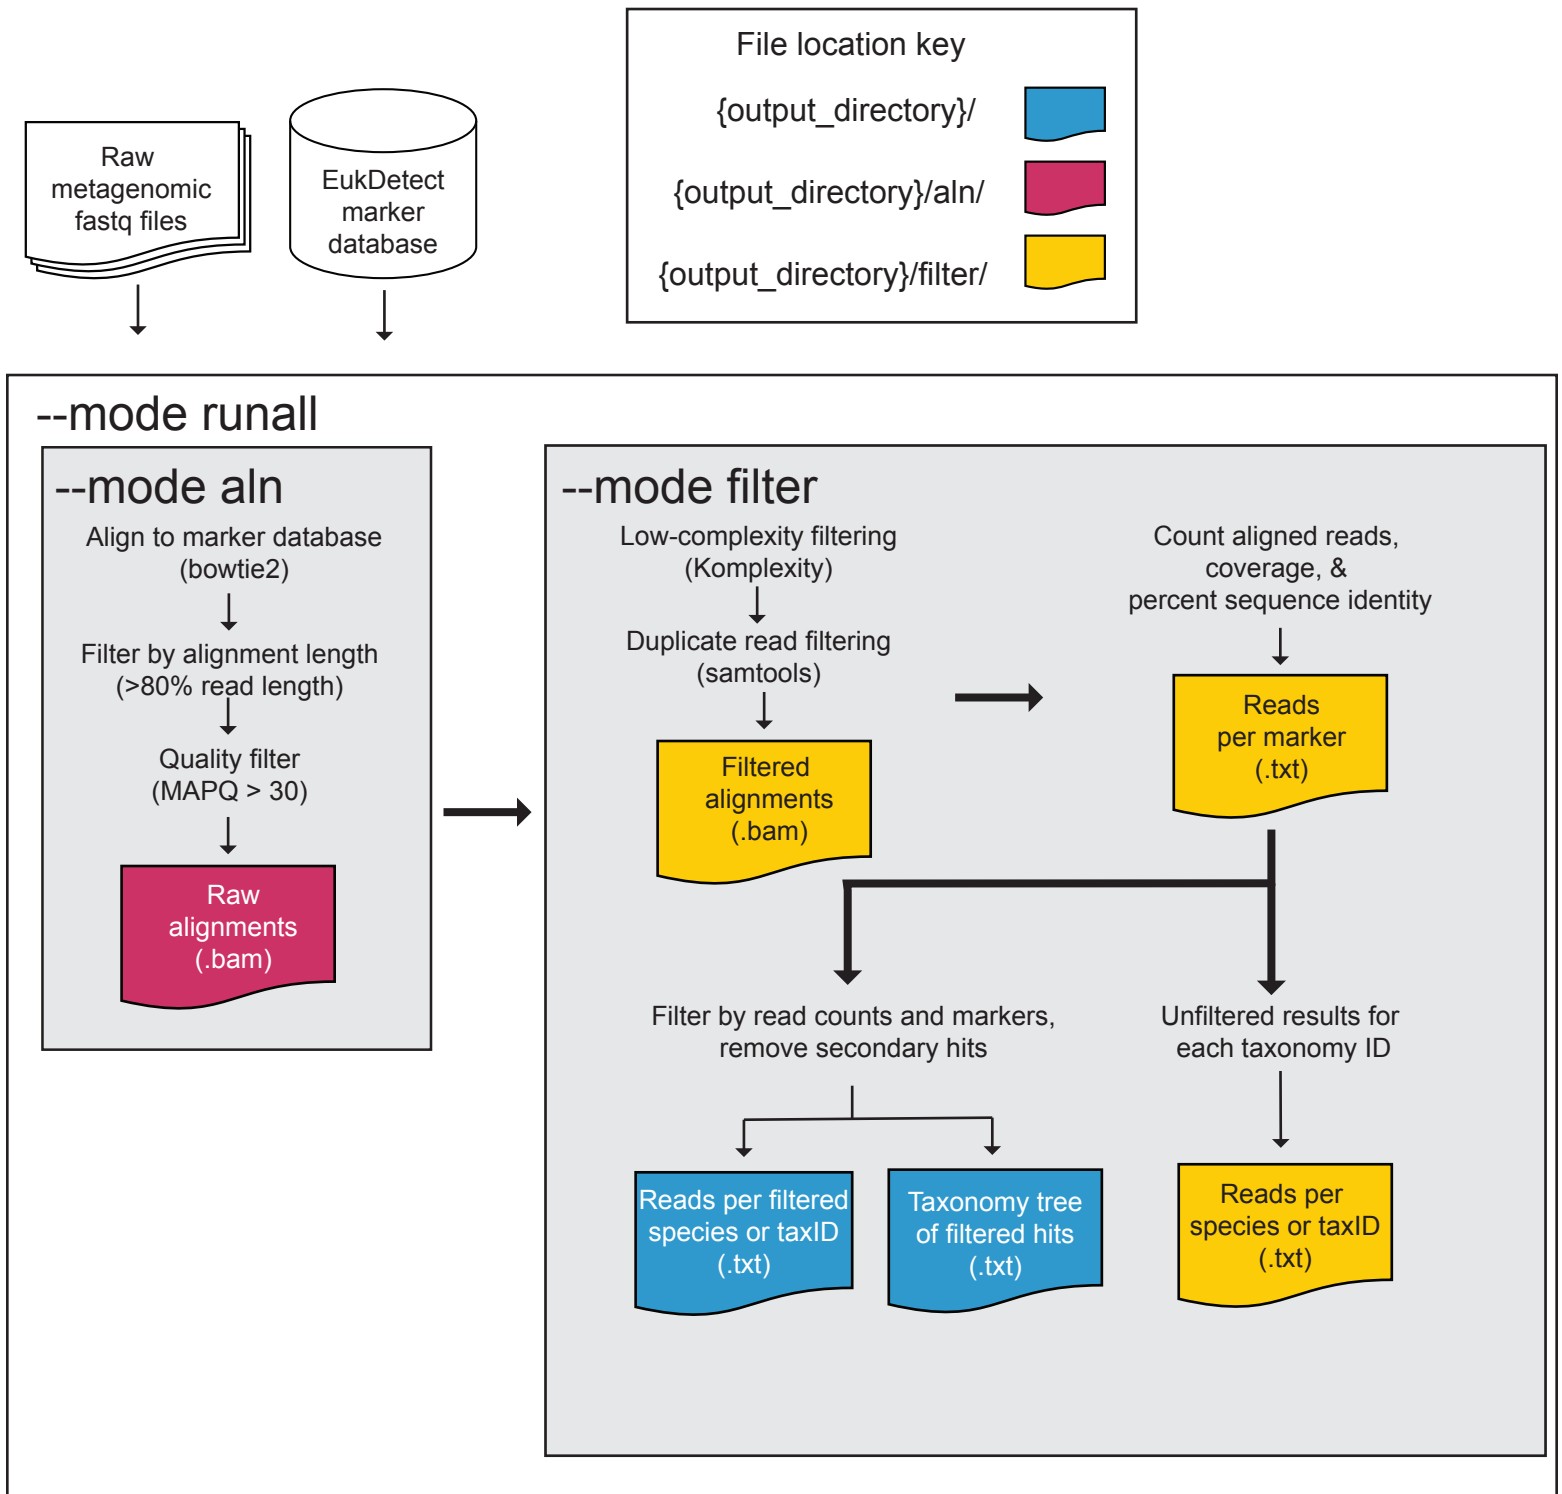

Supplement: Supplementary file [file media-1.pdf]
